# Supplementary material for: A Novel Method to Screen Strong Constitutive Promoters in Escherichia coli and Serratia marcescens for Industrial Applications
Source: MDPI journal article supplement (doi:10.3390/biology12010071), 2022-12-30
Supplement: s1 [file s1]

# **A Novel Method to Screen Strong Constitutive Promoters in *Escherichia coli* and *Serratia marcescens* for Industrial Applications**

Xuewei Pan<sup>1,2</sup>, Mi Tang<sup>1</sup>, Jiajia You<sup>1</sup>, Yanan Hao<sup>1</sup>, Xian Zhang<sup>1</sup>, Taowei Yang<sup>1\*</sup>,  
Zhiming Rao<sup>1</sup>

1. Key Laboratory of Industrial Biotechnology of the Ministry of Education, Laboratory of Applied Microorganisms and Metabolic Engineering, School of Biotechnology, Jiangnan University, Wuxi 214122, China

2. School of Food Science and Technology, Jiangnan University, Wuxi 214122, China

\* Correspondence: [yangtw@jiangnan.edu.cn](mailto:yangtw@jiangnan.edu.cn); Tel.: +86-510-85916881

**Table S1. Strains and plasmids used in this study**

| <b>Strains/Plasmids</b>                     | <b>Characteristics</b>                                                                           | <b>Source</b> |
|---------------------------------------------|--------------------------------------------------------------------------------------------------|---------------|
| <b>Strains</b>                              |                                                                                                  |               |
| <i>Escherichia coli</i> JM109               | Host for cloning                                                                                 | Lab stock     |
| <i>E. coli</i> MG1655                       | Wild-type strain                                                                                 | Lab stock     |
| <i>Corynebacterium glutamicum</i> ATCC13032 | Wild-type strain                                                                                 | Lab stock     |
| <i>Bacillus subtilis</i> 168                | Wild-type strain                                                                                 | Lab stock     |
| <i>Serratia marcescens</i> JNB5-1           | Wild-type strain                                                                                 | Lab stock     |
| Val01                                       | Strain obtained by ARTP mutagenesis derived from <i>E. coli</i> W3110                            | This study    |
| Val02                                       | Val01 derivative with expression of <i>ilvCDE</i> , controlled by P <sub>BS76-50</sub> promoter  | This study    |
| Val03                                       | Val01 derivative with expression of <i>ilvCDE</i> , controlled by P <sub>BS76-75</sub> promoter  | This study    |
| Val04                                       | Val01 derivative with expression of <i>ilvCDE</i> , controlled by P <sub>BS76-85</sub> promoter  | This study    |
| Val05                                       | Val01 derivative with expression of <i>ilvCDE</i> , controlled by P <sub>BS76-100</sub> promoter | This study    |

|                                              |                                                                                                                             |            |
|----------------------------------------------|-----------------------------------------------------------------------------------------------------------------------------|------------|
| SM01                                         | JNB5-1 derivative with expression of <i>pigFN</i> , controlled by P <sub>pig</sub> promoter                                 | This study |
| SM02                                         | JNB5-1 derivative with expression of <i>pigFN</i> , controlled by P <sub>RpIJ</sub> promoter                                | This study |
| SM03                                         | JNB5-1 derivative with expression of <i>pigFN</i> , controlled by P <sub>SM</sub> promoter                                  | This study |
| <b>Plasmids</b>                              |                                                                                                                             |            |
| pUC19                                        | Lac promoter, pBR322 origin, Amp <sup>R</sup>                                                                               | Lab stock  |
| pUC19-P <sub>BBa_J23118</sub> - <i>gfp</i>   | pUC19 derivative with <i>gfp</i> driven by constitutive promoter P <sub>BBa_J23118</sub>                                    | This study |
| pUC19-P <sub>EC</sub> - <i>gfp</i>           | pUC19 derivative with <i>gfp</i> driven by promoter P <sub>EC</sub> screened from <i>E. coli</i> MG1655                     | This study |
| pUC19-P <sub>BS</sub> - <i>gfp</i>           | pUC19 derivative with <i>gfp</i> driven by promoter P <sub>BS</sub> screened from <i>B. subtilis</i> 168                    | This study |
| pUC19-P <sub>CG</sub> - <i>gfp</i>           | pUC19 derivative with <i>gfp</i> driven by promoter P <sub>CG</sub> screened from <i>C. glutamicum</i> ATCC13032            | This study |
| pUC19-P <sub>BS76</sub> - <i>gfp</i>         | pUC19 derivative with <i>gfp</i> driven by promoter P <sub>BS76</sub> truncated from promoter P <sub>BS</sub>               | This study |
| pUC19-P <sub>BS76-variant</sub> - <i>gfp</i> | pUC19 derivative with <i>gfp</i> driven by promoter P <sub>BS76-variant</sub> optimized based on promoter P <sub>BS76</sub> | This study |
| pUC19-P1- <i>gfp</i>                         | pUC19 derivative with <i>gfp</i> driven by truncated promoter P1 derived from promoter P <sub>BS</sub>                      | This study |
| pUC19-P2- <i>gfp</i>                         | pUC19 derivative with <i>gfp</i> driven by truncated promoter P2 derived from promoter P <sub>BS</sub>                      | This study |

|                                            |                                                                                                         |            |
|--------------------------------------------|---------------------------------------------------------------------------------------------------------|------------|
| pUC19-P3- <i>gfp</i>                       | pUC19 derivative with <i>gfp</i> driven by truncated promoter P3 derived from promoter P <sub>BS</sub>  | This study |
| pUC19-P4- <i>gfp</i>                       | pUC19 derivative with <i>gfp</i> driven by truncated promoter P4 derived from promoter P <sub>BS</sub>  | This study |
| pUC19-P5- <i>gfp</i>                       | pUC19 derivative with <i>gfp</i> driven by truncated promoter P5 derived from promoter P <sub>BS</sub>  | This study |
| pUC19-P6- <i>gfp</i>                       | pUC19 derivative with <i>gfp</i> driven by truncated promoter P6 derived from promoter P <sub>BS</sub>  | This study |
| pUC19-P7- <i>gfp</i>                       | pUC19 derivative with <i>gfp</i> driven by truncated promoter P7 derived from promoter P <sub>BS</sub>  | This study |
| pUC19-P8- <i>gfp</i>                       | pUC19 derivative with <i>gfp</i> driven by truncated promoter P8 derived from promoter P <sub>BS</sub>  | This study |
| pUC19-P9- <i>gfp</i>                       | pUC19 derivative with <i>gfp</i> driven by truncated promoter P9 derived from promoter P <sub>BS</sub>  | This study |
| pUC19-P10- <i>gfp</i>                      | pUC19 derivative with <i>gfp</i> driven by truncated promoter P10 derived from promoter P <sub>BS</sub> | This study |
| pUC19-P11- <i>gfp</i>                      | pUC19 derivative with <i>gfp</i> driven by truncated promoter P11 derived from promoter P <sub>BS</sub> | This study |
| pUC19-P12- <i>gfp</i>                      | pUC19 derivative with <i>gfp</i> driven by truncated promoter P12 derived from promoter P <sub>BS</sub> | This study |
| pTrc99a                                    | Expression vector, trc promoter, Amp <sup>R</sup>                                                       | Lab stock  |
| pTrc99a-P <sub>BS</sub> -50- <i>ilvCDE</i> | Expressing <i>ilvCDE</i> via pTrc99a under the control of promoter P <sub>BS</sub> -50                  | This study |
| pTrc99a-P <sub>BS</sub> -75- <i>ilvCDE</i> | Expressing <i>ilvCDE</i> via pTrc99a under the control of promoter P <sub>BS</sub> -75                  | This study |

|                                             |                                                                                                                  |            |
|---------------------------------------------|------------------------------------------------------------------------------------------------------------------|------------|
| pTrc99a-P <sub>BS</sub> -85- <i>ilvCDE</i>  | Expressing <i>ilvCDE</i> via pTrc99a under the control of promoter P <sub>BS</sub> -85                           | This study |
| pTrc99a-P <sub>BS</sub> -100- <i>ilvCDE</i> | Expressing <i>ilvCDE</i> via pTrc99a under the control of promoter P <sub>BS</sub> -100                          | This study |
| pUCP18                                      | Broad-host-range shuttle vector, Amp <sup>R</sup>                                                                | Lab stock  |
| pUCP18-P <sub>SM</sub> - <i>gfp</i>         | pUCP18 derivative with <i>gfp</i> driven by promoter P <sub>SM</sub> screened from <i>S. marcescens</i> JNB5-1   | This study |
| pUCP18-P <sub>pig</sub> - <i>gfp</i>        | pUCP18 derivative with <i>gfp</i> driven by the native promoter P <sub>pig</sub>                                 | This study |
| pUCP18-P <sub>pig</sub> - <i>pigFN</i>      | pUCP18 derivative with <i>pigFN</i> driven by native promoter P <sub>pig</sub>                                   | This study |
| pUCP18-P <sub>RpII</sub> - <i>pigFN</i>     | pUCP18 derivative with <i>pigFN</i> driven by constitutive promoter P <sub>RpII</sub>                            | This study |
| pUCP18-P <sub>SM</sub> - <i>pigFN</i>       | pUCP18 derivative with <i>pigFN</i> driven by promoter P <sub>SM</sub> screened from <i>S. marcescens</i> JNB5-1 | This study |

**Table S2. Primers used in this study**

| <b>Primers</b>      | <b>Sequences (5'-3')</b>                                                | <b>Function</b>                                                               |
|---------------------|-------------------------------------------------------------------------|-------------------------------------------------------------------------------|
| p19-GFP-F1          | AGTACCATGATTACGCCAAGCTTG<br>TCACAATTCCACACATTATACGAGCCGGAT              | Primers used to construction of the plasmid pUC19-P <sub>BBa_23118</sub> -gfp |
| p19-GFP-R1          | GATTAATTGTCAAGCCTGGGGTGCCTAATG<br>AGT<br>TAATGTGTGGAATTGTGAGCGGATAACAAT |                                                                               |
| p19-GFP-F2          | TTCACACAGGAAACAGCTATGAGTAAAGGA<br>GAAGAACTTTTCACTGGAGT                  |                                                                               |
| p19-GFP-R2          | TGGCGTAATCATGGTCATCTATTTGTATAGT<br>TCATCCATGCCATGTGTAATCC               |                                                                               |
| promoter-BS-F1(116) | TAAAGAGGAGAAAGGTACCCGCATAATAAA<br>GGAAAAAGCAGGCGCATG                    | Primers used to identify the core region of the promoter P <sub>BS</sub>      |

---

|                    |                                                             |
|--------------------|-------------------------------------------------------------|
| promoter-BS-F1(96) | TAAAGAGGAGAAAGGTACCCGGCGCATGG<br>ATATAAGGCGC                |
| promoter-BS-F1(76) | TAAAGAGGAGAAAGGTACCCCTGCTTTTTT<br>ATTGTTGAAAGCGCTTTATTTTCCC |
| promoter-BS-F1(56) | TAAAGAGGAGAAAGGTACCCGCGCTTTATT<br>TTCCCCCTACAATAGATGAAAACG  |
| promoter-BS-F1(36) | TAAAGAGGAGAAAGGTACCCAATAGATGA<br>AAACGGCGTGTAAGGGAG         |
| promoter-BS-F1(16) | TAAAGAGGAGAAAGGTACCCAAGGGAGGA<br>GCGATCCATGAGTAAA           |
| promoter-BSTY-R1   | CTATTTGTATAGTTCATCCATGCCATGTGTA<br>ATCC                     |

---

---

|                      |                                  |
|----------------------|----------------------------------|
| promoter-BSTY-F2     | GGATGAACTATACAAATAGCCGGGTACCGA   |
|                      | GCTCGAATTCA                      |
| promoter-BSTY-R2     | GGGTACCTTTCTCCTCTTTAATGAATTCGC   |
|                      | ATGAGTAAAGGAGAAGAACTTTTCACTGGA   |
| promoter-BS76TY-F1   | GT                               |
|                      | CTATTTGTATAGTTCATCCATGCCATGTGTA  |
| promoter-BS76TY-R1   | ATCC                             |
|                      | GGATGAACTATACAAATAGCCGGGTACCGA   |
| promoter-BS76TY-F2   | GCTCGAATTCA                      |
|                      | AGTTCTTCTCCTTTACTCATGCCGTTTTCATC |
| promoter-BS76-R2(56) | TATTGTAGGGGAAAAATAAAG            |
|                      | AGTTCTTCTCCTTTACTCATGGGAAAAATAA  |
| promoter-BS76-R2(36) | AGCGCTTCAACAATAAAAAAGC           |
|                      |                                  |

---



---

|                        |                                   |                                                                                                                |
|------------------------|-----------------------------------|----------------------------------------------------------------------------------------------------------------|
| promoter-BS76-R2(16)   | AGTTCTTCTCCTTTACTCATAACAATAAAAA   |                                                                                                                |
|                        | AGCAGGGGTACCTTTCTCC               |                                                                                                                |
| p19-BS(76)10and1NN-F1  | CTTTATTTTTCCCCTACAATNNNNNNNACG    | Primers used to construction of a gradient promoter library <i>via</i><br>modifying promoter P <sub>BS76</sub> |
|                        | GCGTGTAAGGGAGGAG                  |                                                                                                                |
| p19-BS(76)10NN-F1      | AAAGCGCTTTATTTTTCCCCNNNNNNNAGAT   |                                                                                                                |
|                        | GAAAACGGCGTGTAAGGGAG              |                                                                                                                |
| p19-BS(76)35and10NN-F1 | CTGCTTTTTTATTGTTGAAANNNNNNNNNN    |                                                                                                                |
|                        | NNNNNNNTACAATAGATGAAAACGGCGTGT    |                                                                                                                |
| p19-BS(76)35NN-F1      | AAGGGAG                           |                                                                                                                |
|                        | CCAGGACTGCTTTTTTTATTGNNNNNNNGCGCT |                                                                                                                |
| p19-BS(76)10and1NN-R2  | TTATTTTTCCCCTACAATAGATGAAAACG     |                                                                                                                |
|                        | ATTGTAGGGGAAAAATAAAGCGCTTCAAC     |                                                                                                                |
|                        | A                                 |                                                                                                                |

---

---

|                        |                                          |                                                                                |
|------------------------|------------------------------------------|--------------------------------------------------------------------------------|
| p19-BS(76)10NN-R2      | GGGGAAAAATAAAGCGCTTTCAACAATAAA<br>AAAGC  |                                                                                |
| p19-BS(76)35and10NN-R2 | TTTCAACAATAAAAAAGCAGGCCTGGGG             |                                                                                |
| p19-BS(76)35NN-R2      | CAATAAAAAAGCAGGCCTGGGGTG                 |                                                                                |
| p19-BS(76)TY-R1        | CTATTTGTATAGTTCATCCATGCCATGTGTA<br>ATCCC |                                                                                |
| p19-BS(76)TY-F2        | TGGATGAACTATACAAATAGCCGGGTACC            |                                                                                |
| promoter-BS-F1(76)     | CTGCTTTTTTATTGTTGAAAGCGCTTTATTTT<br>TCCC | Primers used to construction of the plasmid pUC19- <i>P<sub>BS76</sub>-gfp</i> |
| promoter-BS-R1(76)     | CTATTTGTATAGTTCATCCATGCCATGTGTA<br>ATCCC |                                                                                |
| promoter-BS-F2(76)     | TGGATGAACTATACAAATAGCCGGGTACC            |                                                                                |

---

---

|                    |                                  |                                                                                  |
|--------------------|----------------------------------|----------------------------------------------------------------------------------|
| promoter-BS-R2(76) | TTTCAACAATAAAAAAGCAGGCCTGGGGTG   | Primers used to construction of the plasmid pUCP18- <i>P<sub>pig</sub>-pigFN</i> |
|                    | CCTAATGAGT                       |                                                                                  |
| 18-Ppig-pigFN-F1   | AAAACGACGGCCAGTGCCAAGCTTTTTTTTCC |                                                                                  |
|                    | TCCGGAATGCTCCTGC                 |                                                                                  |
| 18-Ppig-pigFN-R1   | TCTTGCTTGGTTAAAGGCATTGGGTTGAGAG  |                                                                                  |
|                    | ATTAAATTAGCTAATATTTCTAGTTTGGAGG  |                                                                                  |
| 18-Ppig-pigFN-F2   | TAATTTAATCTCTCAACCCAATGCCTTTAAC  |                                                                                  |
|                    | CAAGCAAGATGCC                    |                                                                                  |
| 18-Ppig-pigFN-R2   | AAAGCAATCCATACATTCAATTTATTTTTCGC |                                                                                  |
|                    | CGACGATCAGGGT                    |                                                                                  |
| 18-Ppig-pigFN-F3   | TGATCGTCGGCGAAAAATAAATGAATGTAT   |                                                                                  |
|                    | GGATTGCTTTGGCCGT                 |                                                                                  |

---

---

|                   |                                  |                                                                                   |
|-------------------|----------------------------------|-----------------------------------------------------------------------------------|
| 18-Ppig-pigFN-R3  | TTCGAGCTCGGTACCCGGGGATCCTTACAG   | Primers used to construction of the plasmid pUCP18- <i>P<sub>rplJ</sub>-pigFN</i> |
|                   | CACGAAAGGAATGAAACACTTAACCT       |                                                                                   |
| 18-PrplJ-pigFN-F1 | AAAACGACGGCCAGTGCCAAGCTTTCGCAC   |                                                                                   |
|                   | TTGCGATTATCGCTTTG                |                                                                                   |
| 18-PrplJ-pigFN-R1 | TCTTGCTTGGTTAAAGGCATTAGCTTTTTGC  |                                                                                   |
|                   | TCCTGGATTAGCCG                   |                                                                                   |
| 18-PrplJ-pigFN-F2 | AATCCAGGAGCAAAAAGCTAATGCCTTTAA   |                                                                                   |
|                   | CCAAGCAAGATGCC                   |                                                                                   |
| 18-PrplJ-pigFN-R2 | AAAGCAATCCATACATTCAATTTATTTTTCGC |                                                                                   |
|                   | CGACGATCAGGG                     |                                                                                   |
| 18-PrplJ-pigFN-F3 | TGATCGTCGGCGAAAAATAAATGAATGTAT   |                                                                                   |
|                   | GGATTGCTTTGGCCG                  |                                                                                   |

---

---

|                   |                                                                        |                                                                                          |
|-------------------|------------------------------------------------------------------------|------------------------------------------------------------------------------------------|
| 18-PrpIJ-pigFN-R3 | TTCGAGCTCGGTACCCGGGGATCCTTACAG<br>CACGAAAGGAATGAAACACTTAACC            |                                                                                          |
| 18-PSM-pigFN-F1   | AAAACGACGGCCAGTGCCAAGCTTGCCTGC<br>CTTCCGTTTCGTC                        | Primers used to construction of the plasmid pUCP18- <i>P<sub>SM</sub></i> - <i>pigFN</i> |
| 18-PSM-pigFN-R1   | TCTTGCTTGGTTAAAGGCATGAGACCAGAG<br>CTCCAATTATTTATAAACGTAAATAATTACT<br>C |                                                                                          |
| 18-PSM-pigFN-F2   | ATAATTGGAGCTCTGGTCTCATGCCTTTAAC<br>CAAGCAAGATGCC                       |                                                                                          |
| 18-PSM-pigFN-R2   | AAAGCAATCCATACATTCATTTATTTTTCGC<br>CGACGATCAGGG                        |                                                                                          |
| 18-PSM-pigFN-F3   | TGATCGTCGGCGAAAAATAAATGAATGTAT<br>GGATTGCTTTGGCCG                      |                                                                                          |

---

---

|                 |                                                                    |                                                                                 |
|-----------------|--------------------------------------------------------------------|---------------------------------------------------------------------------------|
| 18-PSM-pigFN-R3 | TTCGAGCTCGGTACCCGGGGATCCTTACAG<br>CACGAAAGGAATGAAACACTTAACC        |                                                                                 |
| 18-Ppig-gfp-F1  | AAAACGACGGCCAGTGCCAAGCTTTTTTTTCC<br>TCCGGAATGCTCCTGC               | Primers used to construction of the plasmid pUCP18- <i>P<sub>pig</sub>-gfp</i>  |
| 18-Ppig-gfp-R1  | AGTTCTTCTCCTTTACTCATTGGGTTGAGAG<br>ATTAAATTAGCTAATATTTCTAGTTTGGAGG |                                                                                 |
| 18-Ppig-gfp-F2  | TAATTTAATCTCTCAACCCAATGAGTAAAG<br>GAGAAGAACTTTTCACTGGAGT           |                                                                                 |
| 18-Ppig-gfp-R2  | TTCGAGCTCGGTACCCGGGGATCCCTATTTG<br>TATAGTTCATCCATGCCATGTGTAATCCC   |                                                                                 |
| 18-PrpIJ-gfp-F1 | AAAACGACGGCCAGTGCCAAGCTTTCGCAC<br>TTGCGATTATCGCTTTG                | Primers used to construction of the plasmid pUCP18- <i>P<sub>rplJ</sub>-gfp</i> |

---

---

|                 |                                                                    |                                                                               |
|-----------------|--------------------------------------------------------------------|-------------------------------------------------------------------------------|
| 18-PrpIJ-gfp-R1 | AGTTCTTCTCCTTTACTCATTAGCTTTTTGCT<br>CCTGGATTAGCCG                  |                                                                               |
| 18-PrpIJ-gfp-F2 | AATCCAGGAGCAAAAAGCTAATGAGTAAAG<br>GAGAAGAAGCTTTTCACTGGAGT          |                                                                               |
| 18-PrpIJ-gfp-R2 | TTCGAGCTCGGTACCCGGGGATCCCTATTTG<br>TATAGTTCATCCATGCCATGTGTAATCCC   |                                                                               |
| 18-PSM-gfp-F1   | AAAACGACGGCCAGTGCCAAGCTTGCCTGC<br>CTTCCGTTTCGTC                    | Primers used to construction of the plasmid pUCP18- <i>P<sub>SM</sub>-gfp</i> |
| 18-PSM-gfp-R1   | AGTTCTTCTCCTTTACTCATGAGACCAGAGC<br>TCCAATTATTTATAAACGTAAATAATTACTC |                                                                               |
| 18-PSM-gfp-F2   | ATAATTGGAGCTCTGGTCTCATGAGTAAAG<br>GAGAAGAAGCTTTTCACTGGAGT          |                                                                               |
|                 |                                                                    |                                                                               |

---

---

|                    |                                 |                                                                                     |
|--------------------|---------------------------------|-------------------------------------------------------------------------------------|
| 18-PSM-gfp-R2      | TTCGAGCTCGGTACCCGGGGATCCCTATTTG |                                                                                     |
|                    | TATAGTTCATCCATGCCATGTGTAATCCC   |                                                                                     |
| 99a-BS50-ilvCDE-F1 | AATCGAAACTGGGGGGTTAAGCTGTTTTGG  | Primers used to construction of the plasmid pTrc99a- <i>P<sub>BS50</sub>-ilvCDE</i> |
|                    | CGGATGAGAGAAG                   |                                                                                     |
|                    | AGGGGAAAAATAAAGCGCCTTGATCAATAA  |                                                                                     |
| 99a-BS50-ilvCDE-R1 | AAAAGCAGGCTCATTTTCAGAATATTTGCCA |                                                                                     |
|                    | GAACCG                          |                                                                                     |
|                    | AGGCGCTTTATTTTCCCCTACAATAGATGA  |                                                                                     |
| 99a-BS50-ilvCDE-F2 | AAACGGCGTGTAAGGGAGGAGCGATCCATG  |                                                                                     |
|                    | GCTAACTACTTCAATACACTGAATCTGC    |                                                                                     |
| 99a-BS50-ilvCDE-R2 | TCAGCTTTCTTCGTGGTCATTTAACCCGCAA |                                                                                     |
|                    | CAGCAATACGTT                    |                                                                                     |

---



---

|                    |                                 |                                                                               |
|--------------------|---------------------------------|-------------------------------------------------------------------------------|
| 99a-BS50-ilvCDE-F3 | GTATTGCTGTTGCGGGTTAAATGACCACGA  | Primers used to construction of the plasmid pTrc99a-P <sub>BS75</sub> -ilvCDE |
|                    | AGAAAGCTGATTACATTT              |                                                                               |
| 99a-BS50-ilvCDE-R3 | TTAACCCCCCAGTTTCGATTTATCGC      |                                                                               |
| 99a-BS75-ilvCDE-F1 | GCTGTTTTGGCGGATGAGAGAAG         |                                                                               |
|                    | TAGGGGAAAAATAAAGCGCTTTCAACAATA  |                                                                               |
| 99a-BS75-ilvCDE-R1 | AAAAAGCAGGCTCATTTCAGAATATTTGCC  |                                                                               |
|                    | AGAACCG                         |                                                                               |
|                    | AGCGCTTTATTTTTCCCCTACAATAACGTGC |                                                                               |
| 99a-BS75-ilvCDE-F2 | CACGGCGTGTAAGGGAGGAGCGATCCATGG  |                                                                               |
|                    | CTAACTACTTCAATACACTGAATCTGC     |                                                                               |
| 99a-BS75-ilvCDE-R2 | CAGCTTTCTTCGTGGTCATTTAACCCGCAAC |                                                                               |
|                    | AGCAATACGTT                     |                                                                               |

---

---

|                    |                                 |                                                                               |
|--------------------|---------------------------------|-------------------------------------------------------------------------------|
| 99a-BS75-ilvCDE-F3 | CGTATTGCTGTTGCGGGTTAAATGACCACG  | Primers used to construction of the plasmid pTrc99a-P <sub>BS85</sub> -ilvCDE |
|                    | AAGAAAGCTGATTACATTT             |                                                                               |
| 99a-BS75-ilvCDE-R3 | CTCTCATCCGCCAAAACAGCTTAACCCCCC  |                                                                               |
|                    | AGTTTCGATTTATCGC                |                                                                               |
| 99a-BS85-ilvCDE-F1 | AGCTGTTTTGGCGGATGAGAGAAG        |                                                                               |
|                    | TGTAGGGGAAAAATAAAGCGCCTTGATCAA  |                                                                               |
| 99a-BS85-ilvCDE-R1 | TAAAAAAGCAGGCTCATTTTCAGAATATTTG |                                                                               |
|                    | CCAGAACCG                       |                                                                               |
|                    | CGCTTTATTTTTCCCTACAATAGATGAAAA  |                                                                               |
| 99a-BS85-ilvCDE-F2 | CGGCGTGTAAGGGAGGAGCGATCCATGGCT  |                                                                               |
|                    | AACTACTTCAATACACTGAATCTGC       |                                                                               |
| 99a-BS85-ilvCDE-R2 | AATCAGCTTTCTTCGTGGTCATTTAACCCGC |                                                                               |
|                    | AACAGCAATACGTT                  |                                                                               |

---

---

|                     |                                                                                 |                                                                                |
|---------------------|---------------------------------------------------------------------------------|--------------------------------------------------------------------------------|
| 99a-BS85-ilvCDE-F3  | ATTGCTGTTGCGGGTTAAATGACCACGAAG<br>AAAGCTGATTACATTT                              |                                                                                |
| 99a-BS85-ilvCDE-R3  | TCTCATCCGCCAAAACAGCTTAACCCCCCA<br>GTTTCGATTTATCGC                               |                                                                                |
| 99a-BS100-ilvCDE-F1 | TAAGCTGTTTTGGCGGATGAGAGAAG<br>TTGTAGGGGAAAAATAAAGCGCTTTCAACA                    | Primers used to construction of the plasmid pTrc99a-P <sub>BS100</sub> -ilvCDE |
| 99a-BS100-ilvCDE-R1 | ATAAAAAAGCAGGCTCATTTCAGAATATTT<br>GCCAGAACCG<br>GCTTTATTTTTCCCCTACAATAGATGAAAAC |                                                                                |
| 99a-BS100-ilvCDE-F2 | GGCGTGTAAGGGAGGAGCGATCCATGGCTA<br>ACTACTTCAATACACTGAATCTGC                      |                                                                                |
| 99a-BS100-ilvCDE-R2 | TAATCAGCTTTCTTCGTGGTCATTTAACCCG<br>CAACAGCAATACGTT                              |                                                                                |

---

---

|                     |                                |
|---------------------|--------------------------------|
| 99a-BS100-ilvCDE-F3 | TTGCTGTTGCGGGTTAAATGACCACGAAGA |
|                     | AAGCTGATTACATT                 |
| 99a-BS100-ilvCDE-R3 | TCATCCGCCAAAACAGCTTAACCCCCCAGT |
|                     | TTCGATTTATCGC                  |

---
